# Supplementary material for: Mycobacterium chelonae-abscessus Complex Associated with Sinopulmonary Disease, Northeastern USA
Source: PubMed Central journal article supplement (PMC3322061; doi:10.3201/eid1709.101667), 2011-09
Supplement: 10-1667-Techapp_7p.pdf [file 10-1667-Techapp_7p.pdf]

# *Mycobacterium chelonae-abscessus* Complex Associated with Sinopulmonary Disease, Northeastern USA

## Technical Appendix

Technical Appendix Table 1. Study isolates and sequevar group for the 16S rRNA, *rpoB*, *sodA*, *hsp65* genes and ITS region of the *Mycobacterium chelonae-abscessus* complex \*

| Isolate no.                  | 16S rRNA sequevar group | <i>rpoB</i> sequevar group | <i>sodA</i> sequevar group | <i>hsp65</i> sequevar group | ITS sequevar group |
|------------------------------|-------------------------|----------------------------|----------------------------|-----------------------------|--------------------|
| <i>M. abscessus</i> isolates |                         |                            |                            |                             |                    |
| A001                         | ABS[A]                  | ABS[C]                     | ABS[A]                     | ABS[A]                      | ABS[C]             |
| A003                         | ABS[A]                  | ABS[A]                     | ABS[A]                     | ABS[A]                      | ABS[C]             |
| A004                         | ABS[A]                  | ABS[C]                     | ABS[B]                     | ABS[B]                      | ABS[D]             |
| A005                         | ABS[A]                  | ABS[C]                     | ABS[B]                     | ABS[B]                      | ABS[D]             |
| A006                         | ABS[A]                  | ABS[C]                     | ABS[B]                     | ABS[B]                      | ABS[D]             |
| A007                         | ABS[A]                  | ABS[C]                     | ABS[B]                     | ABS[B]                      | ABS[D]             |
| A010                         | ABS[A]                  | ABS[C]                     | ABS[B]                     | ABS[B]                      | ABS[D]             |
| A011                         | ABS[A]                  | ABS[C]                     | ABS[B]                     | ABS[B]                      | ABS[D]             |
| A014                         | ABS[A]                  | ABS[C]                     | ABS[B]                     | ABS[B]                      | ABS[D]             |
| A015                         | ABS[A]                  | ABS[C]                     | ABS[B]                     | ABS[B]                      | ABS[D]             |
| A017                         | ABS[A]                  | ABS[C]                     | ABS[B]                     | ABS[B]                      | ABS[D]             |
| A020                         | ABS[A]                  | ABS[C]                     | ABS[B]                     | ABS[B]                      | ABS[D]             |
| A021                         | ABS[B]                  | ABS[C]                     | ABS[B]                     | ABS[B]                      | ABS[D]             |
| A023                         | ABS[A]                  | ABS[C]                     | ABS[B]                     | ABS[B]                      | ABS[D]             |
| A024                         | ABS[A]                  | ABS[C]                     | ABS[B]                     | ABS[B]                      | ABS[D]             |
| A029                         | ABS[A]                  | ABS[C]                     | ABS[A]                     | ABS[A]                      | ABS[C]             |
| A030                         | ABS[A]                  | ABS[C]                     | ABS[B]                     | ABS[B]                      | ABS[D]             |
| A032                         | ABS[A]                  | ABS[C]                     | ABS[B]                     | ABS[B]                      | ABS[D]             |
| A033                         | ABS[A]                  | ABS[C]                     | ABS[B]                     | ABS[B]                      | ABS[D]             |
| A034                         | ABS[A]                  | ABS[C]                     | ABS[B]                     | ABS[B]                      | ABS[D]             |
| A035                         | ABS[A]                  | ABS[C]                     | ABS[B]                     | ABS[B]                      | ABS[D]             |
| A036                         | ABS[A]                  | ABS[C]                     | ABS[B]                     | ABS[B]                      | ABS[D]             |
| A039                         | ABS[A]                  | ABS[C]                     | ABS[B]                     | ABS[B]                      | ABS[D]             |
| A041                         | ABS[A]                  | ABS[C]                     | ABS[B]                     | ABS[B]                      | ABS[D]             |
| A042                         | ABS[A]                  | ABS[C]                     | ABS[B]                     | ABS[B]                      | ABS[D]             |
| A043                         | ABS[A]                  | ABS[C]                     | ABS[A]                     | ABS[A]                      | ABS[C]             |
| A044                         | ABS[A]                  | ABS[C]                     | ABS[B]                     | ABS[B]                      | ABS[D]             |
| A046                         | ABS[A]                  | ABS[C]                     | ABS[B]                     | ABS[B]                      | ABS[D]             |
| A047                         | ABS[A]                  | ABS[C]                     | ABS[B]                     | ABS[B]                      | ABS[D]             |
| A048                         | ABS[A]                  | ABS[C]                     | ABS[B]                     | ABS[B]                      | ABS[D]             |
| A049                         | ABS[A]                  | ABS[C]                     | ABS[B]                     | ABS[B]                      | ABS[D]             |
| A050                         | ABS[A]                  | ABS[C]                     | ABS[B]                     | ABS[B]                      | ABS[D]             |
| A051                         | ABS[A]                  | ABS[C]                     | ABS[B]                     | ABS[B]                      | ABS[D]             |
| A052                         | ABS[A]                  | ABS[C]                     | ABS[B]                     | ABS[B]                      | ABS[D]             |
| A053                         | ABS[A]                  | ABS[D]                     | ABS[C]                     | ABS[B]                      | ABS[D]             |
| A054                         | ABS[A]                  | ABS[B]                     | ABS[B]                     | ABS[B]                      | ABS[A]             |
| A056                         | ABS[A]                  | ABS[C]                     | ABS[B]                     | ABS[B]                      | ABS[D]             |
| A057                         | ABS[A]                  | ABS[C]                     | ABS[A]                     | ABS[A]                      | ABS[C]             |
| A058                         | ABS[A]                  | ABS[C]                     | ABS[A]                     | ABS[A]                      | ABS[C]             |
| A059                         | ABS[A]                  | ABS[C]                     | ABS[B]                     | ABS[B]                      | ABS[D]             |
| A060                         | ABS[A]                  | ABS[C]                     | ABS[A]                     | ABS[A]                      | ABS[C]             |
| A061                         | ABS[A]                  | ABS[C]                     | ABS[B]                     | ABS[B]                      | ABS[D]             |
| A063                         | ABS[A]                  | ABS[C]                     | ABS[B]                     | ABS[B]                      | ABS[B]             |
| A064                         | ABS[A]                  | ABS[C]                     | ABS[C]                     | ABS[B]                      | ABS[D]             |

|                                             |        |        |        |        |        |
|---------------------------------------------|--------|--------|--------|--------|--------|
| A065                                        | ABS[A] | ABS[C] | ABS[C] | ABS[B] | ABS[D] |
| A066                                        | ABS[A] | ABS[C] | ABS[C] | ABS[B] | ABS[D] |
| A067                                        | ABS[A] | ABS[D] | ABS[C] | ABS[B] | ABS[D] |
| A068                                        | ABS[A] | ABS[D] | ABS[C] | ABS[B] | ABS[D] |
| A069                                        | ABS[A] | ABS[C] | ABS[B] | ABS[B] | ABS[D] |
| A070                                        | ABS[A] | ABS[D] | ABS[C] | ABS[B] | ABS[D] |
| A071                                        | ABS[A] | ABS[D] | ABS[C] | ABS[B] | ABS[D] |
| A072                                        | ABS[A] | ABS[D] | ABS[C] | ABS[B] | ABS[D] |
| A073                                        | ABS[A] | ABS[C] | ABS[D] | ABS[C] | ABS[D] |
| A074                                        | ABS[A] | ABS[D] | ABS[C] | ABS[B] | ABS[A] |
| A075                                        | ABS[A] | ABS[D] | ABS[C] | ABS[B] | ABS[A] |
| A076                                        | ABS[A] | ABS[D] | ABS[C] | ABS[B] | ABS[A] |
| A077                                        | ABS[A] | ABS[D] | ABS[C] | ABS[B] | ABS[D] |
| A078                                        | ABS[A] | ABS[D] | ABS[C] | ABS[B] | ABS[A] |
| A079                                        | ABS[A] | ABS[C] | ABS[C] | ABS[B] | ABS[D] |
| A080                                        | ABS[A] | ABS[C] | ABS[B] | ABS[B] | ABS[D] |
| A081                                        | ABS[B] | ABS[D] | ABS[C] | ABS[B] | ABS[D] |
| A082                                        | ABS[B] | ABS[D] | ABS[C] | ABS[B] | ABS[D] |
| A083                                        | ABS[B] | ABS[D] | ABS[C] | ABS[B] | ABS[D] |
| <i>M. abscessus</i> CIP 104536 <sup>†</sup> | ABS[A] | ABS[C] | ABS[B] | ABS[B] | ABS[D] |
| <i>M. bolletii</i> isolates                 |        |        |        |        |        |
| <i>M. bolletii</i> CIP 108541 <sup>†</sup>  | ABS[A] | BOL    | BOL    | BOL    | ABS[D] |
| <i>M. chelonae</i> isolates                 |        |        |        |        |        |
| C001                                        | CHE[A] | CHE[G] | CHE[E] | CHE[C] | CHE[G] |
| C002                                        | CHE[A] | CHE[A] | CHE[B] | CHE[A] | CHE[E] |
| C003                                        | CHE[A] | CHE[A] | CHE[A] | CHE[A] | CHE[A] |
| C004                                        | CHE[A] | CHE[B] | CHE[A] | CHE[A] | CHE[F] |
| C005                                        | CHE[A] | CHE[E] | CHE[C] | CHE[A] | CHE[H] |
| C006                                        | CHE[A] | CHE[A] | CHE[B] | CHE[A] | CHE[E] |
| C009                                        | CHE[A] | CHE[G] | CHE[E] | CHE[C] | CHE[G] |
| C010                                        | CHE[A] | CHE[A] | CHE[A] | CHE[A] | CHE[A] |
| C011                                        | CHE[A] | CHE[A] | CHE[A] | CHE[A] | CHE[A] |
| C012                                        | CHE[A] | CHE[A] | CHE[A] | CHE[A] | CHE[A] |
| C013                                        | CHE[A] | CHE[F] | CHE[D] | CHE[A] | CHE[C] |
| C014                                        | CHE[A] | CHE[C] | CHE[B] | CHE[A] | CHE[F] |
| C015                                        | CHE[A] | CHE[G] | CHE[E] | CHE[C] | CHE[G] |
| C016                                        | CHE[D] | CHE[H] | CHE[E] | CHE[C] | CHE[I] |
| C017                                        | CHE[A] | CHE[A] | CHE[A] | CHE[A] | CHE[A] |
| C018                                        | CHE[A] | CHE[A] | CHE[A] | CHE[A] | CHE[A] |
| C019                                        | CHE[A] | CHE[C] | CHE[B] | CHE[A] | CHE[F] |
| C020                                        | CHE[A] | CHE[E] | CHE[C] | CHE[B] | CHE[J] |
| C021                                        | CHE[A] | CHE[C] | CHE[B] | CHE[A] | CHE[F] |
| C022                                        | CHE[D] | CHE[I] | CHE[G] | CHE[C] | CHE[I] |
| C023                                        | CHE[A] | CHE[C] | CHE[B] | CHE[A] | CHE[F] |
| C024                                        | CHE[A] | CHE[A] | CHE[B] | CHE[A] | CHE[E] |
| C025                                        | CHE[B] | CHE[C] | CHE[B] | CHE[A] | CHE[F] |
| C026                                        | CHE[A] | CHE[H] | CHE[E] | CHE[D] | CHE[D] |
| C027                                        | CHE[A] | CHE[E] | CHE[C] | CHE[A] | CHE[H] |
| C029                                        | CHE[A] | CHE[G] | CHE[C] | CHE[E] | CHE[G] |
| C031                                        | CHE[A] | CHE[A] | CHE[B] | CHE[A] | CHE[E] |
| C032                                        | CHE[C] | CHE[A] | CHE[A] | CHE[A] | CHE[A] |
| C033                                        | CHE[A] | CHE[G] | CHE[C] | CHE[E] | CHE[G] |
| C034                                        | CHE[B] | CHE[C] | CHE[B] | CHE[A] | CHE[F] |
| C035                                        | CHE[A] | CHE[C] | CHE[B] | CHE[A] | CHE[F] |
| C038                                        | CHE[A] | CHE[C] | CHE[B] | CHE[A] | CHE[F] |
| C039                                        | CHE[A] | CHE[A] | CHE[B] | CHE[A] | CHE[B] |
| C040                                        | CHE[A] | CHE[C] | CHE[B] | CHE[A] | CHE[F] |
| C041                                        | CHE[A] | CHE[C] | CHE[B] | CHE[A] | CHE[F] |
| C042                                        | CHE[A] | CHE[C] | CHE[B] | CHE[A] | CHE[F] |
| C043                                        | CHE[A] | CHE[A] | CHE[H] | CHE[A] | CHE[E] |
| C044                                        | CHE[D] | CHE[I] | CHE[G] | CHE[C] | CHE[I] |
| C045                                        | CHE[A] | CHE[E] | CHE[C] | CHE[A] | CHE[H] |
| C047                                        | CHE[A] | CHE[A] | CHE[A] | CHE[A] | CHE[A] |
| C048                                        | CHE[A] | CHE[C] | CHE[B] | CHE[A] | CHE[F] |
| C050                                        | CHE[A] | CHE[D] | CHE[C] | CHE[E] | CHE[G] |
| C051                                        | CHE[D] | CHE[I] | CHE[G] | CHE[C] | CHE[I] |

|                                               |        |        |        |        |        |
|-----------------------------------------------|--------|--------|--------|--------|--------|
| C052                                          | CHE[A] | CHE[C] | CHE[B] | CHE[A] | CHE[F] |
| C053                                          | CHE[A] | CHE[A] | CHE[A] | CHE[A] | CHE[A] |
| C054                                          | CHE[A] | CHE[A] | CHE[B] | CHE[A] | CHE[E] |
| C055                                          | CHE[A] | CHE[E] | CHE[C] | CHE[A] | CHE[H] |
| C056                                          | CHE[A] | CHE[C] | CHE[B] | CHE[A] | CHE[F] |
| C057                                          | CHE[A] | CHE[A] | CHE[A] | CHE[A] | CHE[A] |
| C058                                          | CHE[A] | CHE[C] | CHE[B] | CHE[A] | CHE[F] |
| C059                                          | CHE[A] | CHE[A] | CHE[B] | CHE[A] | CHE[E] |
| C060                                          | CHE[A] | CHE[G] | CHE[F] | CHE[E] | CHE[H] |
| C061                                          | CHE[A] | CHE[E] | CHE[C] | CHE[A] | CHE[F] |
| C062                                          | CHE[A] | CHE[C] | CHE[B] | CHE[A] | CHE[H] |
| C063                                          | CHE[A] | CHE[C] | CHE[B] | CHE[A] | CHE[F] |
| C064                                          | CHE[A] | CHE[E] | CHE[C] | CHE[A] | CHE[H] |
| C065                                          | CHE[A] | CHE[H] | CHE[I] | CHE[E] | CHE[K] |
| C066                                          | CHE[A] | CHE[C] | CHE[B] | CHE[A] | CHE[F] |
| <i>M. chelonae</i> ATCC 35758 <sup>1</sup>    | CHE[E] | CHE[J] | CHE[J] | CHE[F] | CHE[L] |
| <i>M. immunogenum</i> isolates                |        |        |        |        |        |
| <i>M. immunogenum</i> CIP 106684 <sup>1</sup> | IMM    | IMM    | IMM    | IMM    | IMM    |
| <i>M. massiliense</i> isolates                |        |        |        |        |        |
| M001                                          | MAS[B] | MAS[A] | ABS[A] | ABS[A] | ABS[C] |
| M002                                          | MAS[B] | MAS[A] | ABS[A] | ABS[A] | ABS[C] |
| M003                                          | ABS[A] | MAS[B] | ABS[A] | ABS[A] | ABS[C] |
| M004                                          | ABS[A] | MAS[B] | ABS[A] | ABS[A] | ABS[C] |
| M005                                          | MAS[B] | MAS[A] | ABS[A] | ABS[A] | ABS[C] |
| <i>M. massiliense</i> CCUG 48898 <sup>1</sup> | ABS[A] | MAS[C] | ABS[A] | ABS[A] | ABS[C] |
| Novel species                                 |        |        |        |        |        |
| CV002                                         | CHE[E] | CV[B]  | CV[B]  | CV[B]  | CV[B]  |
| CV004                                         | CHE[E] | CV [A] | CV [A] | CV [A] | CV [A] |
| CV005                                         | CHE[E] | CV[B]  | CV[B]  | CV[B]  | CV[B]  |
| CV006                                         | CHE[E] | CV [A] | CV [A] | CV [A] | CV [A] |
| CV007                                         | CHE[E] | CV[B]  | CV[B]  | CV[B]  | CV[B]  |
| CV008                                         | CHE[E] | CV[B]  | CV[B]  | CV[B]  | CV[B]  |
| CV010                                         | CHE[E] | CV[B]  | CV[B]  | CV[B]  | CV[B]  |
| CV012                                         | CHE[E] | CV[B]  | CV[B]  | CV[B]  | CV[B]  |
| CV013                                         | CHE[E] | CV [A] | CV [A] | CV [A] | CV [A] |
| CV014                                         | CHE[E] | CV [A] | CV [A] | CV [A] | CV [A] |
| CV015                                         | CHE[E] | CV [A] | CV [A] | CV [A] | CV [A] |
| CV021                                         | NA     | CV[B]  | NA     | NA     | NA     |
| CV022                                         | NA     | CV[D]  | NA     | NA     | NA     |
| CV023                                         | NA     | CV[D]  | NA     | NA     | NA     |
| CV024                                         | NA     | CV [A] | NA     | NA     | NA     |
| CV025                                         | NA     | CV[C]  | NA     | NA     | NA     |
| CV026                                         | NA     | CV[D]  | NA     | NA     | NA     |
| CV027                                         | NA     | CV [A] | NA     | NA     | N/     |
| CV028                                         | NA     | CV[B]  | NA     | NA     | NA     |
| CV030                                         | NA     | CV[B]  | NA     | NA     | NA     |
| CV031                                         | NA     | CV[C]  | NA     | NA     | NA     |
| CV032                                         | NA     | CV[C]  | NA     | NA     | NA     |
| CV033                                         | NA     | CV[B]  | NA     | NA     | NA     |
| CV034                                         | NA     | CV[B]  | NA     | NA     | NA     |
| CV035                                         | NA     | CV[B]  | NA     | NA     | NA     |
| CV036                                         | NA     | CV[A]  | NA     | NA     | NA     |

<sup>1</sup>ITS, internal transcribed spacer; CIP, Collection of Institut Pasteur; NA, not applicable.

Technical Appendix Table 2. Gene designations and corresponding GenBank accession numbers of study isolates and reference sequences from *Mycobacterium abscessus*\*

| Gene name                                                          | Alignment gene length, bp | <i>M. abscessus</i> ORF designation | <i>M. abscessus</i> (NC_010397) Protein ID# | GenBank accession nos. for study isolates |
|--------------------------------------------------------------------|---------------------------|-------------------------------------|---------------------------------------------|-------------------------------------------|
| Translation initiation factor IF-3 ( <i>infC</i> )                 | 531                       | MAB_2321                            | YP_001703056                                | HQ661899–HQ661904                         |
| S-adenosyl-methyltransferase ( <i>mraW</i> )                       | 1014                      | MAB_1998                            | YP_001702734                                | HQ661905–HQ661910                         |
| Phosphatidate cytidyltransferase ( <i>cdsA</i> )                   | 879                       | MAB_3186c                           | YP_001703917                                | HQ661911–HQ661916                         |
| Phosphoribosylaminoimidazole carboxylase ( <i>purE</i> )           | 501                       | MAB_3619c                           | YP_001704347                                | HQ661917–HQ661922                         |
| Preprotein translocase subunit ( <i>secY</i> )                     | 1260                      | MAB_3784c                           | YP_001704513                                | HQ661923–HQ661928                         |
| (HSP-70 cofactor ( <i>grpE</i> ))                                  | 753                       | MAB_4272c                           | YP_001704999                                | HQ661929–HQ661934                         |
| Recombination protein ( <i>recR</i> )                              | 609                       | MAB_0320                            | YP_001701073                                | HQ661935–HQ661940                         |
| Ribonuclease P protein component ( <i>mnpA</i> )                   | 384                       | MAB_4954c                           | YP_001705676                                | HQ661941–HQ661946                         |
| Elongation factor Ts ( <i>tsf</i> )                                | 834                       | MAB_3195c                           | YP_001703926                                | HQ661947–HQ661952                         |
| Hypothetical protein Lactamase B                                   | 1692                      | MAB_3083c                           | YP_001703815                                | HQ661953–HQ661958                         |
| 50S ribosomal protein L7/L12 ( <i>rplL</i> )                       | 390                       | MAB_3876c                           | YP_001704604                                | HQ661959–HQ661964                         |
| 50S ribosomal protein L13 ( <i>rplM</i> )                          | 444                       | MAB_3752c                           | YP_001704480                                | HQ661965–HQ661970                         |
| Co-chaperonin GroES ( <i>groES</i> )                               | 300                       | MAB_3732c                           | YP_001704460                                | HQ661971–HQ661976                         |
| 30S ribosomal protein S1 ( <i>rpsA</i> )                           | 1446                      | MAB_2296                            | YP_001703031                                | HQ661977–HQ661982                         |
| Phosphoribosylformylglycinamide synthase II ( <i>purL</i> )        | 2286                      | MAB_0707                            | YP_001701457                                | HQ661983–HQ661988                         |
| Putative Mrp homolog protein                                       | 1137                      | MAB_1366c                           | YP_001702106                                | HQ661989–HQ661994                         |
| Putative metalloprotease                                           | 513                       | MAB_1669                            | YP_001702408                                | HQ661995–HQ662000                         |
| 50S ribosomal protein L20 ( <i>rplT</i> )                          | 390                       | MAB_2323                            | YP_001703058                                | HQ662001–HQ662006                         |
| ABC transporter ATP-binding protein                                | 720                       | MAB_2747c                           | YP_001703480                                | HQ662007–HQ662012                         |
| Guanylate kinase                                                   | 501                       | MAB_2823c                           | YP_001703556                                | HQ662013–HQ662018                         |
| Elongation factor P ( <i>efP</i> )                                 | 564                       | MAB_2837c                           | YP_001703570                                | HQ662019–HQ662024                         |
| Deoxyuridine 5'-triphosphate nucleotidohydrolase ( <i>dut</i> )    | 453                       | MAB_3003c                           | YP_001703735                                | HQ662025–HQ662030                         |
| 30s ribosomal protein S2 ( <i>rpsB</i> )                           | 849                       | MAB_3196c                           | YP_001703927                                | HQ662031–HQ662036                         |
| Aspartyl/glutamyl-tRNA amidotransferase, B subunit ( <i>gatB</i> ) | 1482                      | MAB_3334c                           | YP_001704064                                | HQ662037–HQ662042                         |
| 30s ribosomal protein S9 ( <i>rpsI</i> )                           | 534                       | MAB_3751c                           | YP_001704479                                | HQ662043–HQ662048                         |
| 50S ribosomal protein L6 ( <i>rplF</i> )                           | 540                       | MAB_3797c                           | YP_001704526                                | HQ662049–HQ662054                         |
| Transcription antitermination protein NusG ( <i>nusG</i> )         | 804                       | MAB_3894c                           | YP_001704622                                | HQ662055–HQ662060                         |
| Adenylosuccinate synthetase ( <i>purA</i> )                        | 1296                      | MAB_4249c                           | YP_001704976                                | HQ662061–HQ662066                         |
| Cell division protein FtsZ ( <i>ftsZ</i> )                         | 1164                      | MAB_2009                            | YP_001702745                                | HQ662067–HQ662072                         |
| Recombinase A ( <i>recA</i> )                                      | 1041                      | MAB_3060c                           | YP_001703792                                | HQ662073–HQ662078                         |
| Tyrosyl-tRNA synthetase ( <i>tyrS</i> )                            | 1293                      | MAB_2354                            | YP_001703089                                | HQ662079–HQ662084                         |
| UDP-N-acetylglucosamine pyrophosphorylase ( <i>glmU</i> )          | 1452                      | MAB_1148c                           | YP_001701890                                | HQ662085–HQ662090                         |
| Valyl-tRNA synthetase ( <i>valS</i> )                              | 2643                      | MAB_1603                            | YP_001702342                                | HQ662091–HQ662096                         |
| Crossover junction endodeoxyribonuclease ( <i>ruvC</i> )           | 510                       | MAB_2884c                           | YP_001703617                                | HQ662097–HQ662102                         |
| DNA-directed RNA polymerase subunit beta ( <i>rpoC</i> )           | 3960                      | MAB_3868c                           | YP_001704596                                | HQ662103–HQ662108                         |
| DNA repair protein RecN ( <i>recN</i> )                            | 1770                      | MAB_2361                            | YP_001703096                                | HQ662109–HQ662114                         |
| GTP-dependent nucleic acid-binding protein ( <i>ychF</i> )         | 1074                      | MAB_1266                            | YP_001702008                                | HQ662115–HQ662120                         |
| GTP-binding protein Era ( <i>era</i> )                             | 915                       | MAB_1672                            | YP_001702411                                | HQ662121–HQ662126                         |
| Hypothetical protein MAB2781c                                      | 978                       | MAB_2781c                           | YP_001703514                                | HQ662127–HQ662132                         |
| Nicotinate-nucleotide adenyltransferase ( <i>nadD</i> )            | 638                       | MAB_1621                            | YP_001702360                                | HQ662133–HQ662138                         |
| 50S ribosomal protein L10 ( <i>rplJ</i> )                          | 531                       | MAB_3877c                           | YP_001704605                                | HQ662139–HQ662144                         |
| 50S ribosomal protein L35 ( <i>rplM</i> )                          | 195                       | MAB_2322                            | YP_001703057                                | HQ662145–HQ662150                         |
| Putative Holliday junction resolvase                               | 522                       | MAB_2850c                           | YP_001703583                                | HQ662151–HQ662156                         |

\*ORF, open reading frame; ID, identification

Technical Appendix Table 3. Similarity table of the average (range) of percent identity between concatenated DNA sequences of 43 genes of the *Mycobacterium chelonae-abscessus* complex type strains and CV002\*

| Strains                                          | Average % identity (range)                      |                                               |                                               |                                        |                                                  |                                                  |
|--------------------------------------------------|-------------------------------------------------|-----------------------------------------------|-----------------------------------------------|----------------------------------------|--------------------------------------------------|--------------------------------------------------|
|                                                  | <i>M. abscessus</i><br>CIP 104536 <sup>Ta</sup> | <i>M. bolletii</i><br>CIP 108541 <sup>T</sup> | <i>M. chelonae</i><br>ATCC 35752 <sup>T</sup> | CV002<br>( <i>M. chelonae</i> variant) | <i>M. massiliense</i><br>CCUG 48898 <sup>T</sup> | <i>M. immunogenum</i><br>CIP 106684 <sup>T</sup> |
| <i>M. abscessus</i><br>CIP 104536 <sup>Ta</sup>  | –                                               | 98.3<br>(94.4–99.8)                           | 89.1<br>(80.7–97.3)                           | 90.0<br>(83.5–97.3)                    | 98.2<br>(92.2–100)                               | 91.4<br>(83.9–98.0)                              |
| <i>M. bolletii</i><br>CIP 108541 <sup>T</sup>    |                                                 | –                                             | 89.3<br>(80.7–98.0)                           | 90.1<br>(83.8–98.0)                    | 98.2<br>(95.1–100)                               | 91.5<br>(84.1–98.3)                              |
| <i>M. chelonae</i><br>ATCC 35752 <sup>T</sup>    |                                                 |                                               | –                                             | 90.0<br>(82.2–98.3)                    | 89.3<br>(81.0–97.7)                              | 89.6<br>(81.0–98.0)                              |
| CV02                                             |                                                 |                                               |                                               | –                                      | 90.1<br>(83.8–97.7)                              | 90.5<br>(83.4–99.7)                              |
| <i>M. massiliense</i><br>CCUG 48898 <sup>T</sup> |                                                 | +                                             |                                               |                                        | –                                                | 91.7<br>(83.9–99.2)                              |

\*Sequences derived from GenBank accession no. NC\_010397. CIP, Collection of Institut Pasteur.

Technical Appendix Table 4. Similarity table of the average (range) of percent identity between concatenated amino acid sequences of 43 genes of the *Mycobacterium chelonae-abscessus* complex type strains and CV002\*

| Strains                                          | Average % identity (range)                     |                                               |                                               |                                        |                                                  |                                                  |
|--------------------------------------------------|------------------------------------------------|-----------------------------------------------|-----------------------------------------------|----------------------------------------|--------------------------------------------------|--------------------------------------------------|
|                                                  | <i>M. abscessus</i><br>CIP 104536 <sup>T</sup> | <i>M. bolletii</i><br>CIP 108541 <sup>T</sup> | <i>M. chelonae</i><br>ATCC 35752 <sup>T</sup> | CV002<br>( <i>M. chelonae</i> variant) | <i>M. massiliense</i><br>CCUG 48898 <sup>T</sup> | <i>M. immunogenum</i><br>CIP 106684 <sup>T</sup> |
| <i>M. abscessus</i><br>CIP 104536 <sup>T</sup>   | –                                              | 99.6<br>(97.6–100)                            | 95.6<br>(83.7–100)                            | 95.9<br>(87.3–100)                     | 99.5<br>(97.8–100)                               | 97.2<br>(88.3–100)                               |
| <i>M. bolletii</i><br>CIP 108541 <sup>T</sup>    |                                                | –                                             | 95.7<br>(84.5–100)                            | 95.9<br>(88.0–100)                     | 99.5<br>(98.2–100)                               | 97.2<br>(88.3–100)                               |
| <i>M. chelonae</i><br>ATCC 35752 <sup>T</sup>    |                                                |                                               | –                                             | 95.8<br>(84.1–100)                     | 95.6<br>(84.5–100)                               | 95.9<br>(84.1–100)                               |
| CV002                                            |                                                |                                               |                                               | –                                      | 95.9<br>(88.0–100)                               | 96.1<br>(86.5–100)                               |
| <i>M. massiliense</i><br>CCUG 48898 <sup>T</sup> |                                                |                                               |                                               |                                        | –                                                | 97.2<br>(88.3–100)                               |

\*CIP, Collection of Institut Pasteur.

Technical Appendix Table 5. Comparison of DNA-DNA hybridization results of patient isolates and phylogenetically related type strains of the *Mycobacterium chelonae-abscessus* complex\*

| Unlabeled DNA                                   | % similarity to radiolabeled CV002 |              | % similarity to radiolabeled CV005 |              |
|-------------------------------------------------|------------------------------------|--------------|------------------------------------|--------------|
|                                                 | RBR at 70°C                        | % Divergence | RBR at 70°C                        | % Divergence |
| CV002                                           | 100                                | 0.0          | 100                                | 0.5          |
| CV004                                           | 80                                 | 1.5          |                                    |              |
| CV005                                           | 66                                 | 0.0          | 100                                | 0.0          |
| CV006                                           | 96                                 | 2.0          |                                    |              |
| CV015                                           | 94                                 | 2.0          |                                    |              |
| <i>M. abscessus</i> CIP 104536 <sup>1</sup>     | 66                                 | 6.0          |                                    |              |
| <i>M. bolletii</i> CIP 108541 <sup>1</sup>      | 15                                 | 6.0          |                                    |              |
| <i>M. chelonae</i> ATCC 35752 <sup>1</sup>      | 42                                 | 8.0          |                                    |              |
| <i>M. immunogenum</i> CIP 106684 <sup>1</sup>   | 65                                 | 5.0          |                                    |              |
| <i>M. massiliense</i> CCUG 48898 <sup>1</sup>   | 69                                 | 6.5          |                                    |              |
| <i>M. salmoniphilum</i> ATCC 13758 <sup>1</sup> | 41                                 | 6.5          |                                    |              |

\*RBR, relative binding ratio (see text for full definition); CIP, Collection of Institut Pasteur.

Technical Appendix Table 6. Case histories of patients with CV recovered during study\*

| Isolate no. | Year isolated | Patient age, y/sex | State | Source            | Underlying condition                                                                                                             | Symptoms                                                                                                                                                                 | Treatment                                                                                                                                   | Outcome                                                                                                                             |
|-------------|---------------|--------------------|-------|-------------------|----------------------------------------------------------------------------------------------------------------------------------|--------------------------------------------------------------------------------------------------------------------------------------------------------------------------|---------------------------------------------------------------------------------------------------------------------------------------------|-------------------------------------------------------------------------------------------------------------------------------------|
| CV002       | 2005          | 9/M                | NY    | Skin lesion       | Unknown                                                                                                                          | Unknown                                                                                                                                                                  | Unknown                                                                                                                                     | Unknown                                                                                                                             |
| CV004       | 2007          | 5/M                | PA    | Central line port | Medulloblastoma, chemotherapy                                                                                                    | Erythema and purulent discharge at central line site                                                                                                                     | Levofloxacin, cefoxitin, clarithromycin                                                                                                     | Infection resolved                                                                                                                  |
| CV005       | 2007          | 2/F                | PA    | Bronchial wash    | Esotropia, vocal cord paralysis, and gastro-duodenal fistula                                                                     | Cough                                                                                                                                                                    | Unknown                                                                                                                                     | Infection resolved                                                                                                                  |
| CV006       | 2007          | 10/F               | PA    | Liver biopsy      | Relapsed acute lymphoblastoma leukemia                                                                                           | Biopsy-confirmed granulomatous liver lesions                                                                                                                             | Clindamycin, ceftazidime                                                                                                                    | Infection resolved                                                                                                                  |
| CV007       | 2007          | 41/F               | PA    | Sputum            | Primary ciliary dyskinesia, bronchiectasis and prior <i>Mycobacterium avium-intracellulare</i> and <i>M. abscessus</i> infection | Dyspnea and increased sputum for several months                                                                                                                          | Intravenous cefepime for 3 weeks                                                                                                            | Symptoms improved                                                                                                                   |
| CV008       | 2007          | 64/F               | PA    | Sputum            | Prednisone therapy, bronchiectasis, multiple episodes of pneumonia and autoimmune hepatitis                                      | Dyspnea and increased sputum production for 3 weeks                                                                                                                      | 10-d course of fluoroquinolone                                                                                                              | Respiratory function subjectively and radiographically improved                                                                     |
| CV010       | 2007          | 72/F               | PA    | Sputum            | Unknown                                                                                                                          | Unknown                                                                                                                                                                  | Unknown                                                                                                                                     | Unknown                                                                                                                             |
| CV012       | 2007          | 63/F               | PA    | Maxillary sinus   | Unknown                                                                                                                          | Unknown                                                                                                                                                                  | Unknown                                                                                                                                     | Unknown                                                                                                                             |
| CV013       | 2007          | 45/F               | PA    | Sputum            | Cystic fibrosis and prior <i>Mycobacterium avium</i> infection                                                                   | Worsening cough, sputum production and dyspnea. Chest CT scan showed bilateral bronchiectasis and tree in bud opacities                                                  | At time of presentation, receiving azithromycin, ethambutol and rifampin for <i>M. avium</i> ; continued on same regimen for several months | Symptoms subjectively improved and follow up cultures were repeatedly negative for <i>M. avium</i> and rapidly growing mycobacteria |
| CV014       | 2007          | 74/F               | PA    | Sputum            | Unknown                                                                                                                          | Three isolates recovered over 3- year period                                                                                                                             | Unknown                                                                                                                                     | Unknown                                                                                                                             |
| CV015       | 2008          | 10/M               | PA    | Sputum            | Eczema                                                                                                                           | Fever, sore throat, stomatitis, and drooling. HSV-1 PCR sputum/saliva positive                                                                                           | Acyclovir                                                                                                                                   | Lost to follow-up                                                                                                                   |
| CV021       | 2008          | 76/M               | NJ    | Bronchial wash    | Unknown                                                                                                                          | Unknown                                                                                                                                                                  | Unknown                                                                                                                                     | Unknown                                                                                                                             |
| CV022       | 2008          | 58/F               | MN    | Sputum            | Unknown                                                                                                                          | Unknown                                                                                                                                                                  | Unknown                                                                                                                                     | Unknown                                                                                                                             |
| CV023       | 2009          | 69/M               | VA    | Respiratory       | Unknown                                                                                                                          | Unknown                                                                                                                                                                  | Unknown                                                                                                                                     | Unknown                                                                                                                             |
| CV024       | 2009          | 78/F               | ME    | Respiratory       | Unknown                                                                                                                          | Unknown                                                                                                                                                                  | Unknown                                                                                                                                     | Unknown                                                                                                                             |
| CV025       | 2009          | 73/F               | OR    | Body fluid        | Unknown                                                                                                                          | Unknown                                                                                                                                                                  | Unknown                                                                                                                                     | Unknown                                                                                                                             |
| CV026       | 2009          | 18/M               | CO    | Sputum            | Unknown                                                                                                                          | Unknown                                                                                                                                                                  | Unknown                                                                                                                                     | Unknown                                                                                                                             |
| CV027       | 2009          | 18/M               | PA    | Sputum            | Diabetes                                                                                                                         | Lung injury following smoke inhalation from house fire. Diagnosed with pulmonary mucormycosis by BAL. Weeks later developed respiratory failure and pulmonary hemorrhage | Unknown                                                                                                                                     | Patient died                                                                                                                        |
| CV028       | 2009          | 38/F               | ME    | Sputum            | Unknown                                                                                                                          | Unknown                                                                                                                                                                  | Unknown                                                                                                                                     | Unknown                                                                                                                             |
| CV030       | 2009          | 48/F               | ME    | Sputum            | Unknown                                                                                                                          | Unknown                                                                                                                                                                  | Unknown                                                                                                                                     | Unknown                                                                                                                             |
| CV031       | 2009          | 53/F               | ND    | Bronchial lavage  | Unknown                                                                                                                          | Unknown                                                                                                                                                                  | Unknown                                                                                                                                     | Unknown                                                                                                                             |

|       |      |      |    |                 |                                               |                                                                                                                                                                                            |         |                                                                          |
|-------|------|------|----|-----------------|-----------------------------------------------|--------------------------------------------------------------------------------------------------------------------------------------------------------------------------------------------|---------|--------------------------------------------------------------------------|
| CV032 | 2009 | 1/M  | NJ | Blood           | Unknown                                       | Unknown                                                                                                                                                                                    | Unknown | Unknown                                                                  |
| CV033 | 2009 | 73/M | PA | Maxillary sinus | Unknown                                       | Unknown                                                                                                                                                                                    | Unknown | Unknown                                                                  |
| CV034 | 2009 | 44/F | PA | Maxillary sinus | Maxillary sinus surgery for chronic sinusitis | Two weeks postoperatively had routine follow-up and complained of nasal drainage.                                                                                                          | None    | Nasal drainage resolved over several weeks without antimicrobial therapy |
| CV035 | 2010 | 66/F | PA | Thigh lesion    | Diabetes                                      | Erythematous 2-cm indurated plaque to a 3.5- x 3.5-cm lesion. First skin biopsy showed granulomatous reaction. Subsequent biopsies showed abscess and adjacent leukocytoclastic vasculitis | Unknown | Unknown                                                                  |
| CV036 | 2010 | 47/M | PA | Maxillary sinus | Unknown                                       | Unknown                                                                                                                                                                                    | Unknown | Unknown                                                                  |

\*CV, *Mycobacterium chelonae* variant; CT, computed tomography; HSV-1, herpes simplex virus 1.
